# Supplementary material for: Effect of Gut Microbial Enterotypes on the Association between Habitual Dietary Fiber Intake and Insulin Resistance Markers in Mexican Children and Adults
Source: MDPI journal article supplement (doi:10.3390/nu13113892), 2021-10-29
Supplement: s1 [file s1]

## Supplementary data

*Gut microbial enterotypes modify the association between habitual dietary fiber intake and insulin resistance markers in Mexican children and adults. Martinez-Medina JN, et al.*

**Supplementary Table S1.** Habitual nutrient intake in the included school-age children.

|                                      | <b>Total Sample<br/>(n = 204)<br/>Median (IQR)</b> | <b>Bacteroides<br/>(n = 136)<br/>Median (IQR)</b> | <b>Prevotella<br/>(n = 68)<br/>Median (IQR)</b> | <b>*P</b> |
|--------------------------------------|----------------------------------------------------|---------------------------------------------------|-------------------------------------------------|-----------|
| Total energy intake (kcal/d)         | 1824.14 (1431.29 - 2201.73)                        | 1846.04 (1440.87 - 2154.09)                       | 1809.95 (1406.36 - 2328.50)                     | 0.85      |
| Fats (%)                             | 38.3 (34.8 - 42.6)                                 | 38.2 (35.3 - 43.2)                                | 38.7 (33.8 - 42.0)                              | 0.31      |
| Proteins (%)                         | 14.8 (13.6 - 16.1)                                 | 14.8 (13.6 - 16.1)                                | 14.8 (13.7 - 15.9)                              | 0.92      |
| Carbohydrates (%)                    | 46.5 (42.5 - 50.7)                                 | 46.6 (41.7 - 50.1)                                | 46.5 (43.0 - 51.2)                              | 0.33      |
| <b>Fats</b>                          |                                                    |                                                   |                                                 |           |
| Dietary cholesterol (mg/1000 kcal/d) | 129.4 (108.1 - 152)                                | 130 (111 - 154)                                   | 126 (105 - 141)                                 | 0.13      |
| Animal fats (g/1000 kcal/d)          | 25.9 (21.5 - 29.6)                                 | 26.1 (22.0 - 29.7)                                | 25.7 (20.7 - 29.3)                              | 0.50      |
| Vegetable fats (g/1000 kcal/d)       | 16.5 (13.9 - 19.6)                                 | 16.4 (13.9 - 20.2)                                | 17.1 (14.3 - 19.1)                              | 0.74      |
| Saturated fats (g/1000 kcal/d)       | 14.1 (12.6 - 15.5)                                 | 14.0 (12.5 - 15.6)                                | 14.2 (12.7 - 15.1)                              | 0.95      |
| Monounsaturated fats (g/1000 kcal/d) | 16.1 (14.3 - 17.8)                                 | 16.2 (14.5 - 17.8)                                | 16.0 (13.8 - 18.0)                              | 0.69      |
| Polyunsaturated fats (g/1000 kcal/d) | 6.96 (5.99 - 8.25)                                 | 7.04 (6.04 - 8.31)                                | 6.87 (5.86 - 8.21)                              | 0.50      |
| <b>Carbohydrates</b>                 |                                                    |                                                   |                                                 |           |
| Glucose (g/1000 kcal/d)              | 7.15 (5.69 - 9.11)                                 | 6.96 (5.61 - 9.11)                                | 7.78 (5.85 - 9.17)                              | 0.32      |
| Fructose (g/1000 kcal/d)             | 10.4 (7.92 - 12.67)                                | 9.78 (7.86 - 12.4)                                | 11.1 (8.18 - 13.6)                              | 0.14      |
| Maltose (g/1000 kcal/d)              | 0.60 (0.49 - 0.76)                                 | 0.59 (0.48 - 0.75)                                | 0.62 (0.50 - 0.79)                              | 0.30      |
| Lactose (g/1000 kcal/d)              | 9.19 (6.16 - 14.14)                                | 9.09 (6.17 - 13.9)                                | 9.29 (6.16 - 14.7)                              | 0.84      |
| Sucrose (g/1000 kcal/d)              | 14.6 (11.5 - 17.7)                                 | 14.3 (11.2 - 17.7)                                | 15.1 (12.2 - 17.5)                              | 0.71      |
| Starch (g/1000 kcal/d)               | 27.0 (20.8 - 34.6)                                 | 27.0 (20.0 - 35.4)                                | 26.78 (21.0 - 33.8)                             | 0.70      |

<sup>1</sup> \*P < 0.05 (U Mann-Whitney test)

## Supplementary data

*Gut microbial enterotypes modify the association between habitual dietary fiber intake and insulin resistance markers in Mexican children and adults. Martinez-Medina JN, et al.*

**Supplementary Table S2:** Habitual nutrient intake in the included adults.

|                                      | <b>Total sample<br/>(n = 75)<br/>Median (IQR)</b> | <b>Bacteroides<br/>(n = 27)<br/>Median (IQR)</b> | <b>Prevotella<br/>(n = 27)<br/>Median (IQR)</b> | <b>Ruminococcaceae<br/>(n = 21)<br/>Median (IQR)</b> | <b>*P</b> |
|--------------------------------------|---------------------------------------------------|--------------------------------------------------|-------------------------------------------------|------------------------------------------------------|-----------|
| Total energy intake (kcal/d)         | 2085.78 (1583.04 - 2427.43)                       | 2085.78 (1581.05- 2404.53)                       | 2223.51 (1602.68 - 2579.91)                     | 1772.75 (1575.70 - 2212.96)                          | 0.39      |
| Fats (%)                             | 33.6 (29.4 – 38.1)                                | 33.6 (29.3 - 39.5)                               | 33.6 (30.3 – 38.1)                              | 33.3 (29.5 – 37.1)                                   | 0.76      |
| Proteins (%)                         | 14.3 (13.3 – 16.3)                                | 14.3 (13.7 - 17.3)                               | 14.0 (13.0 - 15.6)                              | 15.5 (12.8 - 16.1)                                   | 0.57      |
| Carbohydrates (%)                    | 52.0 (46.9 - 56.0)                                | 52.0 (42.7 - 56.0)                               | 51.9 (46.6 - 58.5)                              | 52.3 (47.7 - 56.2)                                   | 0.56      |
| <b>Fats</b>                          |                                                   |                                                  |                                                 |                                                      |           |
| Dietary cholesterol (mg/1000 kcal/d) | 130 (98.5 - 159)                                  | 137 (93.3 - 154)                                 | 133 (103 - 171)                                 | 125 (100 - 157)                                      | 0.76      |
| Animal fats (g/1000 kcal/d)          | 19.1 (15.5 - 23.2)                                | 18.9 (16.4 - 24.0)                               | 19.3 (14.9 - 22.2)                              | 18.3 (15.6 - 22.4)                                   | 0.76      |
| Vegetable fats (g/1000 kcal/d)       | 20.1 (16.8 - 23.1)                                | 20.9 (16.8 - 24.9)                               | 19.5 (14.6 - 22.7)                              | 19.2 (17.6 - 23.5)                                   | 0.58      |
| Saturated fats (g/1000 kcal/d)       | 12.1 (10.3 - 13.4)                                | 12.1 (10.8 - 14.1)                               | 11.9 (10.1 - 13.3)                              | 11.9 (10.0 - 14.1)                                   | 0.76      |
| Monounsaturated fats (g/1000 kcal/d) | 15.9 (14.0 - 18.0)                                | 15.8 (14.1 - 18.9)                               | 16.3 (13.7 - 20.1)                              | 15.4 (14.4 - 17.3)                                   | 0.70      |
| Polyunsaturated fats (g/1000 kcal/d) | 7.59 (6.30 - 9.02)                                | 7.45 (6.36 - 10.0)                               | 7.45 (5.73 - 8.13)                              | 8.01 (6.80 - 9.20)                                   | 0.54      |
| <b>Carbohydrates</b>                 |                                                   |                                                  |                                                 |                                                      |           |
| Glucose (g/1000 kcal/d)              | 7.66 (6.01 - 10.1)                                | 7.91 (6.19 - 11.9)                               | 7.31 (6.01 - 10.5)                              | 7.78 (5.02 - 10.0)                                   | 0.91      |
| Fructose (g/1000 kcal/d)             | 10.1 (8.02 – 14.0)                                | 10.3 (7.94 - 15.6)                               | 9.89 (7.94 – 13.0)                              | 10.2 (8.35 - 13.3)                                   | 0.88      |
| Maltose (g/1000 kcal/d)              | 0.57 (0.46 - 0.73)                                | 0.58 (0.40 - 0.84)                               | 0.55 (0.46 - 0.62)                              | 0.63 (0.48 - 0.76)                                   | 0.41      |
| Lactose (g/1000 kcal/d)              | 3.95 (1.60 - 7.50)                                | 4.62 (1.41 - 8.12)                               | 2.71 (1.53 - 5.95)                              | 4.94 (2.49 - 7.61)                                   | 0.35      |
| Sucrose (g/1000 kcal/d)              | 15.1 (11.3 - 20.6)                                | 15.2 (10.6 - 17.2)                               | 14.5 (11.0 - 24.3)                              | 15.2 (12.3 - 22.8)                                   | 0.68      |
| Starch (g/1000 kcal/d)               | 35.2 (26.9 - 44.2)                                | 34.4 (27.5 - 42.7)                               | 39.0 (29.0 - 47.7)                              | 31.0 (24.7 - 48.8)                                   | 0.47      |

<sup>1</sup> \*P < 0.05 (Kruskal-wallis test)

## Supplementary data

Gut microbial enterotypes modify the association between habitual dietary fiber intake and insulin resistance markers in Mexican children and adults. Martinez-Medina JN, et al.

**Supplementary Table S3.** Correlations of dietary fiber intake and metabolic traits in school-age children.

|                                        | Total fiber |      |      | Soluble fiber |             |      | Insoluble fiber |      |      | Hemi-cellulose |      |      | Cellulose          |             |      | Lignin |             |      |
|----------------------------------------|-------------|------|------|---------------|-------------|------|-----------------|------|------|----------------|------|------|--------------------|-------------|------|--------|-------------|------|
|                                        | rho         | pAdj | pFDR | rho           | pAdj        | pFDR | rho             | pAdj | pFDR | rho            | pAdj | pFDR | rho                | pAdj        | pFDR | rho    | pAdj        | pFDR |
| BMI percentile <sup>a</sup>            | -0.05       | 0.51 | 0.7  | -0.03         | 0.66        | 0.75 | -0.10           | 0.17 | 0.64 | -0.04          | 0.56 | 0.98 | -0.13              | 0.06        | 0.32 | 0.07   | 0.30        | 0.85 |
| Waist/hip ratio <sup>b</sup>           | 0.04        | 0.55 | 0.7  | 0.07          | 0.36        | 0.75 | -0.11           | 0.11 | 0.64 | 0.01           | 0.85 | 0.98 | -4x10 <sup>-</sup> | 0.95        | 0.99 | 0.05   | 0.46        | 0.85 |
| Body fat (%) <sup>b</sup>              | -0.04       | 0.57 | 0.7  | -0.03         | 0.63        | 0.75 | -0.11           | 0.12 | 0.64 | -0.06          | 0.39 | 0.98 | -0.10              | 0.14        | 0.46 | 0.06   | 0.40        | 0.85 |
| Systolic BP percentile <sup>c</sup>    | -0.08       | 0.28 | 0.64 | -0.02         | 0.78        | 0.8  | -0.02           | 0.83 | 0.83 | -0.05          | 0.48 | 0.98 | 0.02               | 0.74        | 0.91 | -0.06  | 0.39        | 0.85 |
| Diastolic BP percentile <sup>c</sup>   | 0.02        | 0.81 | 0.81 | 0.03          | 0.64        | 0.75 | 0.03            | 0.72 | 0.82 | -0.03          | 0.65 | 0.98 | 0.10               | 0.16        | 0.46 | 0.02   | 0.79        | 0.89 |
| Uric acid (mg/dL) <sup>d</sup>         | -0.04       | 0.53 | 0.7  | 0.06          | 0.41        | 0.75 | -0.03           | 0.69 | 0.82 | -0.06          | 0.41 | 0.98 | 0.00               | 0.99        | 0.99 | -0.02  | 0.83        | 0.89 |
| Total cholesterol (mg/dL) <sup>d</sup> | -0.04       | 0.61 | 0.7  | -0.05         | 0.47        | 0.75 | -0.04           | 0.53 | 0.82 | -0.03          | 0.73 | 0.98 | 0.06               | 0.39        | 0.69 | 0.05   | 0.51        | 0.85 |
| HDL (mg/dL) <sup>d</sup>               | -0.09       | 0.21 | 0.64 | -0.17         | <b>0.01</b> | 0.16 | 0.08            | 0.28 | 0.64 | 0.02           | 0.73 | 0.98 | 0.13               | 0.06        | 0.32 | 0.05   | 0.53        | 0.85 |
| LDL (mg/dL) <sup>d</sup>               | -0.04       | 0.56 | 0.7  | -0.02         | 0.80        | 0.8  | -0.05           | 0.48 | 0.82 | -0.01          | 0.89 | 0.98 | -0.03              | 0.66        | 0.91 | 0.00   | 0.99        | 0.99 |
| Triglycerides (mg/dL) <sup>d</sup>     | 0.08        | 0.26 | 0.64 | 0.09          | 0.19        | 0.75 | -0.08           | 0.25 | 0.64 | -0.02          | 0.74 | 0.98 | 0.16               | <b>0.02</b> | 0.32 | -0.03  | 0.71        | 0.89 |
| AST (IU/L) <sup>d</sup>                | 0.10        | 0.15 | 0.64 | 0.07          | 0.31        | 0.75 | 0.04            | 0.61 | 0.82 | 0.00           | 0.95 | 0.98 | -0.03              | 0.69        | 0.91 | 0.11   | 0.12        | 0.52 |
| ALT (IU/L) <sup>d</sup>                | 0.10        | 0.16 | 0.64 | 0.03          | 0.64        | 0.75 | 0.02            | 0.78 | 0.83 | 0.03           | 0.63 | 0.98 | -0.07              | 0.30        | 0.6  | 0.17   | <b>0.02</b> | 0.32 |
| GGT (IU/L) <sup>d</sup>                | -0.02       | 0.79 | 0.81 | 0.04          | 0.61        | 0.75 | -0.03           | 0.65 | 0.82 | 0.02           | 0.73 | 0.98 | -0.10              | 0.18        | 0.46 | 0.02   | 0.74        | 0.89 |
| Glucose (mg/dL) <sup>d</sup>           | 0.05        | 0.49 | 0.7  | 0.05          | 0.52        | 0.75 | -0.10           | 0.17 | 0.64 | 0.00           | 0.98 | 0.98 | 0.09               | 0.20        | 0.46 | -0.03  | 0.68        | 0.89 |
| Insulin (IU/mL) <sup>d</sup>           | -0.08       | 0.24 | 0.64 | -0.11         | 0.11        | 0.69 | -0.07           | 0.33 | 0.66 | -0.01          | 0.87 | 0.98 | -0.02              | 0.74        | 0.91 | -0.11  | 0.13        | 0.52 |
| HOMA-IR <sup>d</sup>                   | -0.08       | 0.27 | 0.64 | -0.11         | 0.13        | 0.69 | -0.08           | 0.28 | 0.64 | -0.01          | 0.86 | 0.98 | -0.02              | 0.82        | 0.94 | -0.11  | 0.13        | 0.52 |

<sup>1</sup>Spearman test. Statistical significance pAdj < 0.05

<sup>2</sup>a without adjustment.

<sup>3</sup>b adjusted by age and sex.

<sup>4</sup>c adjusted by body fat (%).

<sup>5</sup>d adjusted by age, sex, and body fat (%).

<sup>6</sup>Fiber data presented as g/1000 kcal/d; n = 204

<sup>7</sup>BP: Blood pressure; AST: Aspartate aminotransferase; ALT: Alanine aminotransferase; GGT: Gamma glutamyl transferase

## Supplementary data

*Gut microbial enterotypes modify the association between habitual dietary fiber intake and insulin resistance markers in Mexican children and adults. Martinez-Medina JN, et al.*

**Supplementary Table S4.** Correlations of dietary fiber intake and metabolic traits in adults.

|                                        | Total fiber |      |      | Soluble fiber |      |      | Insoluble fiber |             |      | Hemi-cellulose |             |      | Cellulose |      |      | Lignin |             |      |
|----------------------------------------|-------------|------|------|---------------|------|------|-----------------|-------------|------|----------------|-------------|------|-----------|------|------|--------|-------------|------|
|                                        | rho         | pAdj | pFDR | rho           | pAdj | pFDR | rho             | pAdj        | pFDR | rho            | pAdj        | pFDR | rho       | pAdj | pFDR | rho    | pAdj        | pFDR |
| BMI <sup>a</sup>                       | -0.02       | 0.90 | 0.96 | -0.04         | 0.74 | 0.85 | 0.05            | 0.65        | 0.96 | 0.07           | 0.54        | 0.66 | 0.02      | 0.90 | 0.96 | -0.06  | 0.64        | 0.93 |
| Waist/hip ratio <sup>a</sup>           | -0.20       | 0.10 | 0.73 | -0.13         | 0.29 | 0.85 | -0.25           | <b>0.03</b> | 0.43 | -0.22          | 0.06        | 0.48 | 0.00      | 0.97 | 0.97 | -0.31  | <b>0.01</b> | 0.16 |
| Body fat (%) <sup>a</sup>              | 0.13        | 0.30 | 0.73 | 0.05          | 0.67 | 0.85 | 0.17            | 0.15        | 0.54 | 0.28           | <b>0.02</b> | 0.32 | 0.12      | 0.32 | 0.76 | 0.03   | 0.79        | 0.96 |
| Systolic BP (mmHg) <sup>b</sup>        | -0.08       | 0.52 | 0.84 | -0.07         | 0.55 | 0.85 | -0.02           | 0.89        | 0.96 | -0.06          | 0.60        | 0.69 | 0.03      | 0.79 | 0.95 | 0.04   | 0.73        | 0.96 |
| Diastolic BP (mmHg) <sup>b</sup>       | -0.15       | 0.22 | 0.73 | -0.18         | 0.14 | 0.85 | -0.01           | 0.92        | 0.96 | -0.05          | 0.71        | 0.71 | -0.11     | 0.38 | 0.76 | 0.01   | 0.96        | 0.96 |
| Uric acid (mg/dL) <sup>b</sup>         | 0.06        | 0.62 | 0.84 | 0.15          | 0.23 | 0.85 | 0.01            | 0.94        | 0.96 | 0.09           | 0.48        | 0.66 | 0.10      | 0.42 | 0.76 | 0.02   | 0.84        | 0.96 |
| Total cholesterol (mg/dL) <sup>b</sup> | -0.18       | 0.14 | 0.73 | -0.13         | 0.28 | 0.85 | -0.01           | 0.94        | 0.96 | -0.10          | 0.40        | 0.66 | -0.11     | 0.37 | 0.76 | -0.15  | 0.23        | 0.46 |
| HDL (mg/dL) <sup>b</sup>               | 0.05        | 0.71 | 0.86 | -0.06         | 0.62 | 0.85 | 0.21            | 0.08        | 0.43 | 0.15           | 0.22        | 0.64 | 0.03      | 0.83 | 0.95 | 0.17   | 0.16        | 0.45 |
| LDL (mg/dL) <sup>b</sup>               | -0.19       | 0.11 | 0.73 | -0.12         | 0.34 | 0.85 | -0.08           | 0.51        | 0.89 | -0.09          | 0.45        | 0.66 | -0.06     | 0.60 | 0.89 | -0.18  | 0.13        | 0.45 |
| Triglycerides (mg/dL) <sup>b</sup>     | -0.08       | 0.54 | 0.84 | -0.01         | 0.91 | 0.95 | 0.01            | 0.96        | 0.96 | -0.17          | 0.15        | 0.64 | -0.10     | 0.43 | 0.76 | -0.14  | 0.26        | 0.46 |
| AST (IU/L) <sup>b</sup>                | -0.02       | 0.85 | 0.96 | -0.01         | 0.95 | 0.95 | -0.04           | 0.76        | 0.96 | -0.08          | 0.50        | 0.66 | 0.04      | 0.73 | 0.95 | 0.02   | 0.91        | 0.96 |
| ALT (IU/L) <sup>b</sup>                | -0.06       | 0.63 | 0.84 | -0.06         | 0.63 | 0.85 | -0.09           | 0.45        | 0.89 | -0.05          | 0.67        | 0.71 | -0.19     | 0.12 | 0.76 | -0.06  | 0.61        | 0.93 |
| GGT (IU/L) <sup>b</sup>                | -0.13       | 0.31 | 0.73 | -0.10         | 0.41 | 0.85 | -0.13           | 0.29        | 0.77 | -0.15          | 0.22        | 0.64 | -0.16     | 0.19 | 0.76 | -0.21  | 0.09        | 0.45 |
| Glucose (mg/dL) <sup>b</sup>           | 0.00        | 0.98 | 0.98 | 0.04          | 0.74 | 0.85 | -0.11           | 0.38        | 0.87 | -0.12          | 0.32        | 0.64 | 0.14      | 0.26 | 0.76 | -0.22  | 0.07        | 0.45 |
| Insulin (IU/mL) <sup>b</sup>           | -0.10       | 0.41 | 0.82 | -0.06         | 0.65 | 0.85 | -0.21           | 0.08        | 0.43 | -0.13          | 0.29        | 0.64 | -0.06     | 0.61 | 0.89 | -0.14  | 0.26        | 0.46 |
| HOMA-IR <sup>b</sup>                   | -0.12       | 0.32 | 0.73 | -0.10         | 0.41 | 0.85 | -0.17           | 0.17        | 0.54 | -0.14          | 0.24        | 0.64 | -0.11     | 0.37 | 0.76 | -0.17  | 0.17        | 0.45 |

<sup>1</sup>Spearman test. Statistical significance pAdj < 0.05

<sup>2</sup>a adjusted by age and sex

<sup>3</sup>b adjusted by age, sex and body fat (%).

<sup>4</sup>Fiber data presented as g/1000 kcal/d; n = 75

<sup>5</sup>BP: Blood pressure; AST: Aspartate aminotransferase; ALT: Alanine aminotransferase; GGT: Gamma glutamyl transferase

## Supplementary data

*Gut microbial enterotypes modify the association between habitual dietary fiber intake and insulin resistance markers in Mexican children and adults. Martinez-Medina JN, et al.*

**Supplementary Table S5.** FDR corrected P-values of correlations between dietary fiber intake and metabolic traits in children

|                           | Bacteroides |               |                 |               |           |        | Prevotella  |               |                 |               |           |        |
|---------------------------|-------------|---------------|-----------------|---------------|-----------|--------|-------------|---------------|-----------------|---------------|-----------|--------|
|                           | Total fiber | Soluble fiber | Insoluble fiber | Hemicellulose | Cellulose | Lignin | Total fiber | Soluble Fiber | Insoluble fiber | Hemicellulose | Cellulose | Lignin |
| BMI                       | 0.73        | 0.94          | 0.93            | 0.79          | 0.60      | 1.00   | 0.89        | 0.82          | 0.42            | 0.90          | 0.94      | 0.62   |
| Waist/hip ratio           | 0.73        | 0.77          | 0.93            | 0.95          | 0.86      | 1.00   | 0.89        | 0.95          | 0.42            | 0.90          | 0.72      | 0.62   |
| Body fat (%)              | 0.84        | 0.94          | 0.93            | 0.79          | 0.60      | 1.00   | 0.89        | 0.82          | 0.42            | 0.90          | 0.94      | 0.73   |
| Systolic BP (mmHg)        | 0.84        | 0.85          | 0.93            | 0.79          | 0.86      | 1.00   | 0.89        | 0.57          | 0.43            | 0.90          | 0.72      | 0.43   |
| Diastolic BP (mmHg)       | 0.84        | 0.85          | 0.93            | 0.79          | 0.86      | 1.00   | 0.89        | 0.82          | 0.42            | 0.88          | 0.26      | 0.96   |
| Uric acid (mg/dL)         | 0.73        | 0.94          | 0.93            | 0.79          | 0.86      | 1.00   | 0.89        | 0.77          | 0.87            | 0.90          | 0.96      | 0.62   |
| Total cholesterol (mg/dL) | 0.93        | 0.98          | 0.93            | 0.88          | 0.86      | 1.00   | 0.89        | 0.66          | 0.42            | 0.90          | 0.73      | 0.62   |
| HDL (mg/dL)               | 0.73        | 0.43          | 0.93            | 0.95          | 0.86      | 1.00   | 0.89        | 0.57          | 0.79            | 0.90          | 0.26      | 0.73   |
| LDL (mg/dL)               | 0.84        | 0.98          | 0.99            | 0.79          | 0.86      | 1.00   | 0.89        | 0.77          | 0.42            | 0.90          | 0.72      | 0.62   |
| Triglycerides (mg/dL)     | 0.73        | 0.77          | 0.99            | 0.79          | 0.60      | 1.00   | 0.89        | 0.57          | 0.42            | 0.88          | 0.72      | 0.62   |
| TG_HDL_ratio              | 0.73        | 0.43          | 0.93            | 0.79          | 0.86      | 1.00   | 0.89        | 0.57          | 0.42            | 0.88          | 0.72      | 0.62   |
| AST (IU/L)                | 0.84        | 0.85          | 0.93            | 0.79          | 0.86      | 1.00   | 0.79        | 0.82          | 0.42            | 0.90          | 0.96      | 0.26   |
| ALT (IU/L)                | 0.84        | 0.98          | 0.93            | 0.95          | 0.86      | 1.00   | 0.79        | 0.77          | 0.43            | 0.90          | 0.72      | 0.00   |
| GGT (IU/L)                | 0.73        | 0.98          | 0.93            | 0.79          | 0.86      | 1.00   | 0.89        | 0.66          | 0.42            | 0.62          | 0.72      | 0.43   |
| Glucose (mg/dL)           | 0.84        | 0.94          | 0.93            | 0.96          | 0.60      | 1.00   | 0.89        | 0.82          | 0.42            | 0.90          | 0.96      | 0.62   |
| Insulin (IU/mL)           | 0.84        | 0.85          | 0.99            | 0.79          | 0.86      | 1.00   | 0.79        | 0.57          | 0.42            | 0.17          | 0.96      | 0.43   |
| HOMA-IR                   | 0.84        | 0.85          | 0.99            | 0.79          | 0.86      | 1.00   | 0.85        | 0.57          | 0.42            | 0.17          | 0.96      | 0.43   |

## Supplementary data

*Gut microbial enterotypes modify the association between habitual dietary fiber intake and insulin resistance markers in Mexican children and adults. Martinez-Medina JN, et al.*

**Supplementary Table S6.** FDR corrected P-values of correlations between dietary fiber intake and metabolic traits in adults enterotypes

|                           | Bacteroides |               |                 |                |           |        | Prevotella  |               |                 |                |           |        | Ruminococcaceae |               |                 |                |           |        |
|---------------------------|-------------|---------------|-----------------|----------------|-----------|--------|-------------|---------------|-----------------|----------------|-----------|--------|-----------------|---------------|-----------------|----------------|-----------|--------|
|                           | Total fiber | Soluble fiber | Insoluble fiber | Hemi-cellulose | Cellulose | Lignin | Total fiber | Soluble fiber | Insoluble fiber | Hemi-cellulose | Cellulose | Lignin | Total fiber     | Soluble fiber | Insoluble fiber | Hemi-cellulose | Cellulose | Lignin |
| BMI                       | 0.85        | 0.93          | 0.90            | 0.93           | 0.17      | 0.93   | 0.96        | 0.95          | 0.77            | 0.84           | 0.14      | 0.86   | 0.66            | 0.60          | 1.00            | 0.98           | 0.71      | 0.77   |
| Waist/hip ratio           | 0.57        | 0.93          | 0.57            | 0.75           | 1.00      | 0.17   | 0.96        | 0.91          | 0.59            | 0.41           | 0.43      | 0.57   | 0.53            | 0.53          | 1.00            | 0.98           | 0.60      | 0.77   |
| Body fat (%)              | 0.82        | 0.93          | 0.57            | 0.93           | 0.40      | 0.93   | 0.26        | 0.51          | 0.29            | 0.14           | 0.96      | 0.24   | 0.53            | 0.34          | 1.00            | 0.68           | 0.71      | 0.34   |
| Systolic BP (mmHg)        | 0.83        | 0.98          | 0.60            | 0.83           | 0.94      | 0.93   | 0.80        | 0.70          | 0.77            | 0.75           | 0.96      | 0.68   | 0.66            | 0.60          | 1.00            | 0.98           | 0.43      | 0.94   |
| Diastolic BP (mmHg)       | 0.82        | 0.93          | 0.57            | 0.75           | 0.94      | 1.00   | 0.62        | 0.70          | 0.77            | 0.84           | 0.86      | 0.68   | 0.53            | 0.34          | 1.00            | 0.98           | 0.17      | 0.77   |
| Uric acid (mg/dL)         | 0.82        | 0.93          | 0.57            | 0.93           | 0.95      | 0.93   | 0.96        | 0.96          | 0.77            | 0.84           | 0.49      | 0.68   | 0.53            | 0.34          | 1.00            | 0.98           | 0.40      | 0.60   |
| Total cholesterol (mg/dL) | 0.43        | 0.93          | 0.57            | 0.26           | 0.40      | 0.85   | 0.80        | 0.62          | 0.77            | 0.83           | 0.96      | 0.84   | 0.66            | 0.78          | 1.00            | 0.98           | 0.71      | 0.88   |
| HDL (mg/dL)               | 0.82        | 0.98          | 0.57            | 0.75           | 0.72      | 0.93   | 0.77        | 0.95          | 0.29            | 0.14           | 0.27      | 0.09   | 0.66            | 0.78          | 1.00            | 0.85           | 0.71      | 0.77   |
| LDL (mg/dL)               | 0.17        | 0.93          | 0.34            | 0.26           | 0.40      | 0.34   | 1.00        | 0.95          | 0.77            | 0.83           | 0.78      | 0.84   | 0.66            | 0.82          | 1.00            | 0.98           | 0.71      | 0.77   |
| Triglycerides (mg/dL)     | 0.83        | 0.93          | 0.83            | 0.75           | 0.95      | 0.93   | 0.62        | 0.70          | 0.59            | 0.36           | 0.14      | 0.24   | 0.53            | 0.53          | 0.34            | 0.98           | 0.71      | 0.77   |
| TG_HDL_ratio              | 0.82        | 0.93          | 0.57            | 0.75           | 0.94      | 0.93   | 0.62        | 0.85          | 0.29            | 0.14           | 0.14      | 0.09   | 0.53            | 0.53          | 0.34            | 0.98           | 0.71      | 0.77   |
| AST (IU/L)                | 0.82        | 0.97          | 0.57            | 0.93           | 0.72      | 0.93   | 0.17        | 0.34          | 0.29            | 0.32           | 0.43      | 0.57   | 0.66            | 0.78          | 1.00            | 0.98           | 0.95      | 0.99   |
| ALT (IU/L)                | 0.82        | 0.93          | 0.57            | 0.93           | 0.66      | 1.00   | 0.17        | 0.51          | 0.29            | 0.14           | 0.14      | 0.20   | 0.66            | 0.79          | 1.00            | 0.98           | 0.60      | 0.88   |
| GGT (IU/L)                | 0.82        | 0.93          | 0.61            | 0.51           | 0.94      | 0.93   | 0.82        | 0.95          | 0.77            | 0.36           | 0.68      | 0.28   | 0.64            | 0.53          | 1.00            | 0.98           | 0.00      | 0.77   |
| Glucose (mg/dL)           | 0.83        | 0.99          | 0.57            | 0.75           | 0.94      | 0.93   | 0.96        | 0.95          | 0.77            | 0.68           | 0.96      | 0.51   | 0.53            | 0.53          | 1.00            | 0.98           | 0.71      | 0.88   |
| Insulin (IU/mL)           | 0.83        | 0.93          | 0.90            | 0.75           | 0.40      | 1.00   | 0.26        | 0.51          | 0.29            | 0.14           | 0.14      | 0.09   | 0.66            | 0.62          | 1.00            | 0.98           | 0.95      | 0.77   |
| HOMA-IR                   | 0.83        | 0.93          | 0.83            | 0.93           | 0.40      | 1.00   | 0.31        | 0.51          | 0.29            | 0.14           | 0.14      | 0.09   | 0.66            | 0.80          | 1.00            | 0.98           | 0.71      | 0.77   |

## Supplementary data

*Gut microbial enterotypes modify the association between habitual dietary fiber intake and insulin resistance markers in Mexican children and adults. Martinez-Medina JN, et al.*

**Supplementary Table S7:** Habitual nutrient intake in children based on Community typing with Dirichlet Multinomial Mixtures.

|                                      | <b>Total sample<br/>(n = 204)<br/>Median (IQR)</b> | <b>Bacteroides<br/>(n = 83)<br/>Median (IQR)</b> | <b>Prevotella<br/>(n = 58)<br/>Median (IQR)</b> | <b>Bacteroides 2<br/>(n = 63)<br/>Median (IQR)</b> | <b>*P</b>    |
|--------------------------------------|----------------------------------------------------|--------------------------------------------------|-------------------------------------------------|----------------------------------------------------|--------------|
| Total energy intake (kcal/d)         | 1824.14 (1431.29 - 2201.73)                        | 1742.60 (1402.2-2124.65)                         | 1856.10 (1419.94-2386.05)                       | 1864.23 (1449.09-2167.44)                          | 0.63         |
| Fats (%)                             | 38.3 (34.8 - 42.6)                                 | 38.3 (35.3-43.7)                                 | 38.4 (34.0-42.0)                                | 38.4 (35.0-41.8)                                   | 0.54         |
| Proteins (%)                         | 14.8 (13.6 - 16.1)                                 | 14.9 (13.6-16.1)                                 | 14.7 (13.7-15.9)                                | 14.6 (13.5-16.0)                                   | 0.77         |
| Carbohydrates (%)                    | 46.5 (42.5 - 50.7)                                 | 46.6 (41.2-50.1)                                 | 46.9 (42.8-51.1)                                | 46.4 (43.3-51.1)                                   | 0.55         |
| <b>Fats</b>                          |                                                    |                                                  |                                                 |                                                    |              |
| Dietary cholesterol (mg/1000 kcal/d) | 129.4 (108.1 - 152)                                | 131.1 (110.9-162.9)                              | 129.7 (109.5-143.4)                             | 127.7 (102.7-150.5)                                | 0.42         |
| Animal fats (g/1000 kcal/d)          | 25.9 (21.5 - 29.6)                                 | 26.2 (22.4-30.1)                                 | 25.8 (21.1-29.6)                                | 25.4 (20.8-29.2)                                   | 0.24         |
| Vegetable fats (g/1000 kcal/d)       | 16.5 (13.9 - 19.6)                                 | 16.1 (13.9-20.2)                                 | 16.5 (13.7-19.1)                                | 17.1 (14.0-19.6)                                   | 0.74         |
| Saturated fats (g/1000 kcal/d)       | 14.1 (12.6 - 15.5)                                 | 14.5 (12.4-16.0)                                 | 14.2 (12.9-15.7)                                | 13.5 (12.3-14.8)                                   | 0.54         |
| Monounsaturated fats (g/1000 kcal/d) | 16.1 (14.3 - 17.8)                                 | 7.12 (6.09-8.42)                                 | 7.01 (5.89-8.24)                                | 6.86 (5.98-8.00)                                   | 0.65         |
| Polyunsaturated fats (g/1000 kcal/d) | 6.96 (5.99 - 8.25)                                 | 16.4 (14.5-18.1)                                 | 16.0 (13.8-17.9)                                | 15.9 (14.0-17.4)                                   | 0.90         |
| <b>Carbohydrates</b>                 |                                                    |                                                  |                                                 |                                                    |              |
| Glucose (g/1000 kcal/d)              | 7.15 (5.69 - 9.11)                                 | 6.84 (5.17-9.34)                                 | 7.27 (5.72-8.82)                                | 7.44 (5.97-9.44)                                   | 0.36         |
| Fructose (g/1000 kcal/d)             | 10.4 (7.92 - 12.67)                                | 9.62 (7.18-12.3)                                 | 10.6 (7.98-12.3)                                | 10.9 (8.25-13.6)                                   | 0.68         |
| Maltose (g/1000 kcal/d)              | 0.60 (0.49 - 0.76)                                 | 0.60 (0.49-0.75)                                 | 0.60 (0.49-0.75)                                | 0.60 (0.49-0.81)                                   | 0.80         |
| Lactose (g/1000 kcal/d)              | 9.19 (6.16 - 14.14)                                | 9.28 (6.12-14.5)                                 | 9.80 (6.35-15.79)                               | 8.47 (6.04-13.4)                                   | 0.08         |
| Sucrose (g/1000 kcal/d)              | 14.6 (11.5 - 17.7)                                 | 13.9 (11.2-17.7)                                 | 15.1 (11.8-17.2)                                | 15.1 (11.7-18.0)                                   | 0.58         |
| Starch (g/1000 kcal/d)               | 27.0 (20.8 - 34.6)                                 | 26.0 (19.4-35.7)                                 | 27.9 (21.1-33.9)                                | 27.3 (21.9-35.2)                                   | 0.58         |
| <b>Fiber</b>                         |                                                    |                                                  |                                                 |                                                    |              |
| Total DF (g/1000kcal/day)            | 10.4 (8.73 - 11.8)                                 | 10.0 (8.66-11.3)                                 | 10.1 (8.29-11.9)                                | 10.8 (9.14-12.0)                                   | 0.16         |
| Soluble fiber (g/1000kcal/day)       | 2.95 (2.44 - 3.53)                                 | 2.93 (2.44-3.35)                                 | 2.84 (2.34-3.55)                                | 3.10 (2.65-3.73)                                   | 0.17         |
| Insoluble fiber (g/1000kcal/day)     | 5.67 (4.94 - 6.59)                                 | 5.67 (4.76-6.46) <sup>a</sup>                    | 5.33 (4.71-6.45) <sup>a</sup>                   | 5.83 (5.39-7.29) <sup>b</sup>                      | <b>0.01*</b> |
| Hemicellulose (g/1000kcal/day)       | 1.82 (1.53 - 2.31)                                 | 1.76 (1.48-2.19)                                 | 1.80 (1.54-2.15)                                | 1.95 (1.58-2.61)                                   | 0.10         |
| Cellulose (g/1000kcal/day)           | 2.67 (1.96 - 4.24)                                 | 2.54 (2.01-4.05)                                 | 2.82 (1.69-4.28)                                | 2.74 (2.04-4.45)                                   | 0.54         |
| Lignin (g/1000kcal/day)              | 0.46 (0.37 - 0.57)                                 | 0.46 (0.35-0.58)                                 | 0.44 (0.35-0.57)                                | 0.48 (0.40-0.58)                                   | 0.56         |
| AI of dietary fiber; n (%)           | 23.0 (11.2)                                        | 5 (21.7)                                         | 8 (34.8)                                        | 10 (43.5)                                          | 0.14         |

<sup>1</sup> \*P < 0.05 (Kruskal-wallis test). <sup>abc</sup> Different letters indicate statistically significant differences between groups after a post hoc Dunn's test.

## Supplementary data

*Gut microbial enterotypes modify the association between habitual dietary fiber intake and insulin resistance markers in Mexican children and adults. Martinez-Medina JN, et al.*

**Supplementary Table S8:** Habitual nutrient intake in adults based on Community typing with Dirichlet Multinomial Mixtures.

|                                      | <b>Total sample<br/>(n = 75)<br/>Median (IQR)</b> | <b>Bacteroides<br/>(n = 27)<br/>Median (IQR)</b> | <b>Prevotella<br/>(n = 23)<br/>Median (IQR)</b> | <b>Bacteroides 2<br/>(n = 25)<br/>Median (IQR)</b> | <b>*P</b> |
|--------------------------------------|---------------------------------------------------|--------------------------------------------------|-------------------------------------------------|----------------------------------------------------|-----------|
| Total energy intake (kcal/d)         | 2085.78 (1583.04 - 2427.43)                       | 1777.3 (1568.36-2199.12)                         | 2327.71 (1921.90-2582.13)                       | 2085.78 (1651.36-2445.29)                          | 0.25      |
| Fats (%)                             | 33.6 (29.4 – 38.1)                                | 33.3 (31.3-37.3)                                 | 33.6 (28.9-38.1)                                | 33.6 (29.2-39.3)                                   | 0.90      |
| Proteins (%)                         | 14.3 (13.3 – 16.3)                                | 15.5 (13.1-16.3)                                 | 14.0 (13.0-14.0)                                | 14.3 (13.5-17.5)                                   | 0.59      |
| Carbohydrates (%)                    | 52.0 (46.9 - 56.0)                                | 51.9 (47.3-54.8)                                 | 51.6 (46.6-58.7)                                | 52.1 (44.5-56.6)                                   | 0.76      |
| <b>Fats</b>                          |                                                   |                                                  |                                                 |                                                    |           |
| Dietary cholesterol (mg/1000 kcal/d) | 130 (98.5 - 159)                                  | 130.7 (98.5-159.8)                               | 133.6 (107.0-189.0)                             | 129.0 (88.5-151.0)                                 | 0.50      |
| Animal fats (g/1000 kcal/d)          | 19.1 (15.5 - 23.2)                                | 19.1 (16.0-22.1)                                 | 20.0 (14.9-23.9)                                | 18.7 (16.3-23.7)                                   | 0.91      |
| Vegetable fats (g/1000 kcal/d)       | 20.1 (16.8 - 23.1)                                | 18.4 (16.9-22.8)                                 | 20.1 (14.6-23.3)                                | 20.5 (16.1-24.0)                                   | 0.79      |
| Saturated fats (g/1000 kcal/d)       | 12.1 (10.3 - 13.4)                                | 12.1 (10.0-14.2)                                 | 11.9 (10.1-13.0)                                | 12.1 (10.9-13.7)                                   | 0.74      |
| Monounsaturated fats (g/1000 kcal/d) | 15.9 (14.0 - 18.0)                                | 15.9 (14.7-17.8)                                 | 16.5 (13.6-20.1)                                | 15.6 (13.9-18.1)                                   | 0.89      |
| Polyunsaturated fats (g/1000 kcal/d) | 7.59 (6.30 - 9.02)                                | 7.67 (6.62-9.08)                                 | 7.59 (5.73-8.94)                                | 7.45 (6.34-9.51)                                   | 0.80      |
| <b>Carbohydrates</b>                 |                                                   |                                                  |                                                 |                                                    |           |
| Glucose (g/1000 kcal/d)              | 7.66 (6.01 - 10.1)                                | 7.78 (5.05-9.88)                                 | 7.04 (6.01-10.5)                                | 7.91 (6.08-12.8)                                   | 0.93      |
| Fructose (g/1000 kcal/d)             | 10.1 (8.02 – 14.0)                                | 10.2 (8.31-12.6)                                 | 9.89 (7.94-12.9)                                | 10.3 (7.89-15.7)                                   | 0.92      |
| Maltose (g/1000 kcal/d)              | 0.57 (0.46 - 0.73)                                | 0.55 (0.48-0.74)                                 | 0.55 (0.46-0.62)                                | 0.60 (0.40-0.84)                                   | 0.39      |
| Lactose (g/1000 kcal/d)              | 3.95 (1.60 - 7.50)                                | 3.81 (1.83-7.54)                                 | 2.71(1.52-5.95)                                 | 5.35 (1.75-8.42)                                   | 0.43      |
| Sucrose (g/1000 kcal/d)              | 15.1 (11.3 - 20.6)                                | 14.9 (10.6-22.2)                                 | 15.2 (11.3-24.3)                                | 15.2 (10.9-17.1)                                   | 0.77      |
| Starch (g/1000 kcal/d)               | 35.2 (26.9 - 44.2)                                | 31.3. (23.9-46.7)                                | 39.0 (30.4-47.7)                                | 34.4 (27.2-42.9)                                   | 0.26      |
| <b>Fiber</b>                         |                                                   |                                                  |                                                 |                                                    |           |
| Total DF (g/1000kcal/day)            | 11.5 (9.25 - 13.9)                                | 10.81 (9.16-13.37)                               | 11.9 (8.64-14.58)                               | 11.65 (9.61-13.77)                                 | 0.83      |
| Soluble fiber (g/1000kcal/day)       | 3.68 (2.63 - 4.44)                                | 3.10 (2.44-4.37)                                 | 3.67 (2.97-5.16)                                | 3.75 (2.84-4.40)                                   | 0.45      |
| Insoluble fiber (g/1000kcal/day)     | 6.07 (4.88 - 7.25)                                | 6.05 (5.47-7.21)                                 | 5.82 (4.35-8.57)                                | 6.26 (5.20-7.23)                                   | 0.95      |
| Hemicellulose (g/1000kcal/day)       | 1.91 (1.61 - 2.50)                                | 1.75 (1.55-2.19)                                 | 2.03 (1.31-2.99)                                | 1.92 (1.67-2.37)                                   | 0.35      |
| Cellulose (g/1000kcal/day)           | 3.62 (2.24 - 5.12)                                | 3.09 (2.22-4.89)                                 | 3.74 (2.32-5.79)                                | 3.33 (2.14-4.77)                                   | 0.68      |
| Lignin (g/1000kcal/day)              | 0.47 (0.34 - 0.65)                                | 0.47 (0.37-0.66)                                 | 0.40 (0.34-0.73)                                | 0.47 (0.34-0.71)                                   | 0.88      |
| AI of dietary fiber; n (%)           | 25.0 (33.3)                                       | 7 (28.0)                                         | 9 (36.0)                                        | 9 (36.0)                                           | 0.58      |

<sup>1</sup> \*P < 0.05 (Kruskal-wallis test. <sup>abc</sup> Different letters indicate statistically significant differences between groups after a post hoc Dunn's test.



### Supplementary data

*Gut microbial enterotypes modify the association between habitual dietary fiber intake and insulin resistance markers in Mexican children and adults. Martinez-Medina JN, et al.*

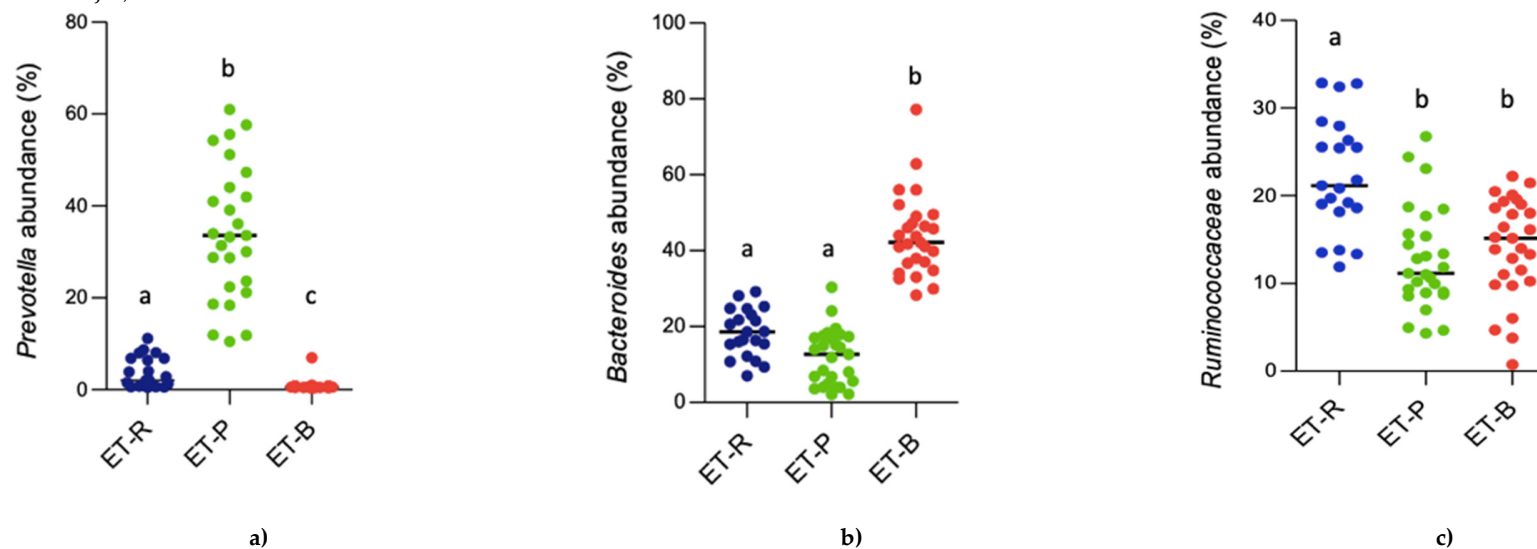

**Supplementary Figure S1.** Relative abundance of driver taxa among enterotypes (a) *Prevotella*, (b) *Bacteroides*, and (c) *Ruminococcaceae*. ET-R: *Ruminococcaceae* enterotype; ET-P: *Prevotella* enterotype, ET-B: *Bacteroides* enterotype. Data are presented as median and IQR; ET-R: n = 21; ET-P: n = 27 and ET-B: n = 27. <sup>abc</sup> Different letters indicate statistically significant differences between groups after a post hoc Dunn's test.

### Supplementary data

*Gut microbial enterotypes modify the association between habitual dietary fiber intake and insulin resistance markers in Mexican children and adults. Martinez-Medina JN, et al.*

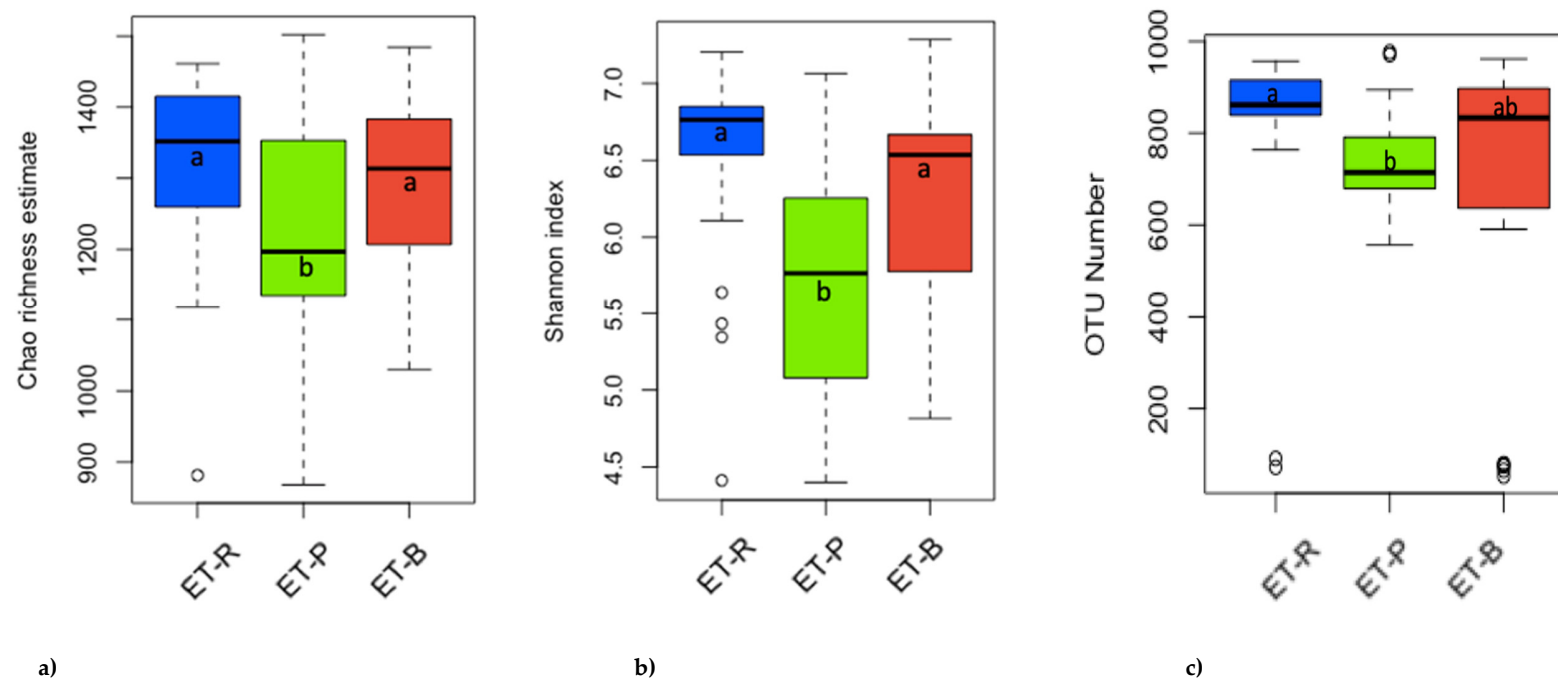

**Supplementary Figure S2.** Alpha diversity estimates within identified enterotypes in adults. **(a)** Chao richness estimate, **(b)** Shannon index, **(c)** Observed OTUs. ET-R: *Ruminococcaceae* enterotype; ET-P: *Prevotella* enterotype, ET-B: *Bacteroides* enterotype. Data are presented as median and IQR; ET-R: n = 21; ET-P: n = 27 and ET-B: n = 27. <sup>ab</sup> Different letters indicate statistically significant differences between groups after a post hoc Dunn's test.

## Supplementary data

*Gut microbial enterotypes modify the association between habitual dietary fiber intake and insulin resistance markers in Mexican children and adults. Martinez-Medina JN, et al.*

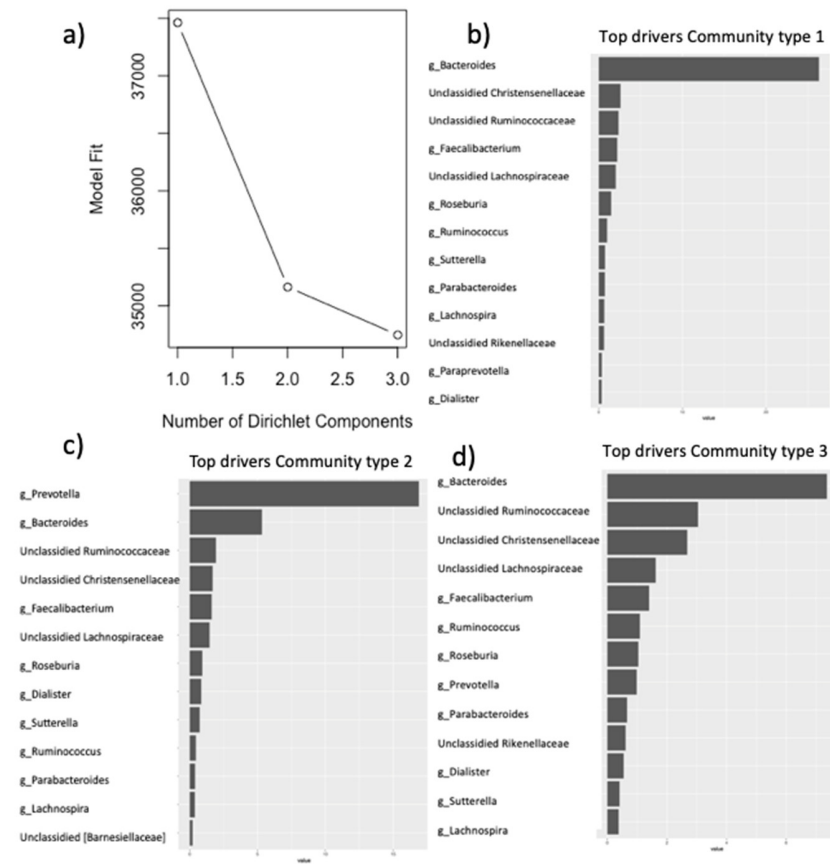

**Supplementary Figure S3.** Community typing with Dirichlet Multinomial Mixtures in children. **(a)** Number of Optimal Dirichlet Components, **(b)** Top driver taxa: community type 1, **(c)** Top driver taxa: community type 2, **(d)** Top driver taxa: community type 3.

## Supplementary data

*Gut microbial enterotypes modify the association between habitual dietary fiber intake and insulin resistance markers in Mexican children and adults. Martinez-Medina JN, et al.*

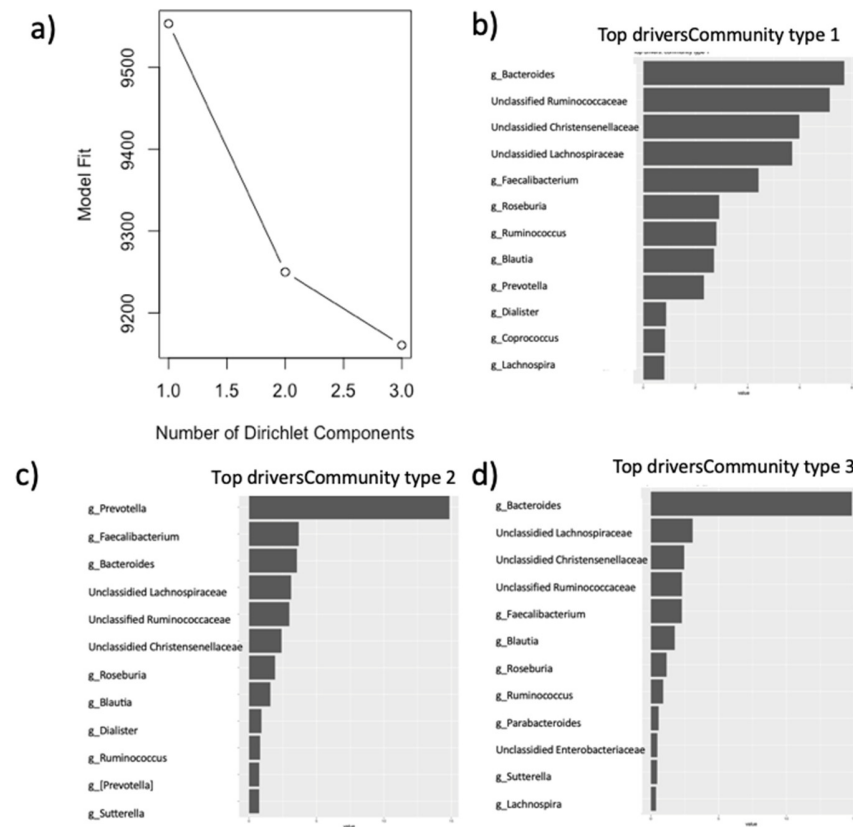

**Supplementary Figure S4.** Community typing with Dirichlet Multinomial Mixtures in adults. **(a)** Number of Optimal Dirichlet Components, **(b)** Top driver taxa: community type 1, **(c)** Top driver taxa: community type 2, **(d)** Top driver taxa: community type 3.
